# Supplementary material for: An effective urobilin clearance strategy based on paramagnetic beads facilitates microscale proteomic analysis of urine
Source: Royal Society of Chemistry journal article supplement (doi:10.1039/d4an00312h), 2024-01-01
Supplement: d4an00312h1.zip [file supplementary_tables.xlsx]

## Sheet: Table S4
Table S4：Age, gender and clinical information of patients included in the study together with their PSA levels, histology grading and tumor stage.
Sample No.	Sample Code	Group	Diagnosis	Age	PSA (ng/ml)	Т	N	М	Stage	Gleason score	Sample size(mL)
1	PCa1	PCa	Adenocarcinoma prostate	68	0.355	T3b	M0	N0	IIIB	8(4+4)	15
2	PCa2	PCa	Adenocarcinoma prostate	73	35.6	T3b	M1	N0	IVB	7(4+3)	15
3	PCa3	PCa	Adenocarcinoma prostate	66	12.1	T2b	M0	N0	IIIC	7(4+3)	15
4	PCa4	PCa	Adenocarcinoma prostate	67	100	T2c	M0	N0	IIIC	7(4+3)	15
5	PCa5	PCa	Adenocarcinoma prostate	70	46.8	T3b	M0	N0	IIIC	9(5+4)	15
6	BPH1	BPH	Benign prostate hyperplasia	61	4.39	N/A	N/A	N/A	N/A	N/A	15
7	BPH2	BPH	Benign prostate hyperplasia	70	12.3	N/A	N/A	N/A	N/A	N/A	15
8	BPH3	BPH	Benign prostate hyperplasia	58	11.19	N/A	N/A	N/A	N/A	N/A	15
9	BPH4	BPH	Benign prostate hyperplasia	71	10.53	N/A	N/A	N/A	N/A	N/A	15
10	H1	H	N/A	27	N/A	N/A	N/A	N/A	N/A	N/A	15
11	H2	H	N/A	26	N/A	N/A	N/A	N/A	N/A	N/A	15
12	H3	H	N/A	29	N/A	N/A	N/A	N/A	N/A	N/A	15
13	H4	H	N/A	27	N/A	N/A	N/A	N/A	N/A	N/A	15
14	H5	H	N/A	27	N/A	N/A	N/A	N/A	N/A	N/A	15
15	H6	H	N/A	36	N/A	N/A	N/A	N/A	N/A	N/A	15
16	H7	H	N/A	26	N/A	N/A	N/A	N/A	N/A	N/A	15

## Sheet: Table S5
Table S5: Differentially expressed proteins between PCa and BPH groups.
ProteinGroups	Genes	logFC	P.Value	adj.P.Val
O00461	GOLIM4	2.8412	0.0427688	0.805875
O00584	RNASET2	1.50514	0.0450349	0.805875
O75074	LRP3	1.27935	0.0225499	0.805875
O75390	CS	-3.11819	0.00724646	0.805875
O75635	SERPINB7	-2.58332	0.0300513	0.805875
O75787	ATP6AP2	-2.06236	0.0368461	0.805875
O95428	PAPLN	-1.99963	0.0442199	0.805875
O95831	AIFM1	-2.25767	0.0156875	0.805875
O95841	ANGPTL1	-1.78804	0.0286898	0.805875
P00505	GOT2	-1.84199	0.0224857	0.805875
P01601	IGKV1D-16	2.58378	0.0367965	0.805875
P01715	IGLV3-1	1.48043	0.0464011	0.805875
P04156	PRNP	1.30342	0.0141786	0.805875
P04278	SHBG	-1.68845	0.0103184	0.805875
P04844	RPN2	-1.92194	0.0109174	0.805875
P05166	PCCB	-2.82625	0.0256543	0.805875
P07307	ASGR2	1.63975	0.0339644	0.805875
P08174	CD55	1.00262	0.0499162	0.805875
P08697	SERPINF2	-1.33041	0.0474194	0.805875
P08887	IL6R	-1.16146	0.0465011	0.805875
P09210	GSTA2	-1.68881	0.021462	0.805875
P09603	CSF1	1.14723	0.0413988	0.805875
P09622	DLD	-3.75095	0.0133579	0.805875
P10451	SPP1	3.93662	0.00394875	0.805875
P10768	ESD	2.24448	0.0480393	0.805875
P12109	COL6A1	-1.15061	0.043527	0.805875
P12111	COL6A3	1.47179	0.0222029	0.805875
P16070	CD44	1.23183	0.0241898	0.805875
P17927	CR1	-1.4853	0.0201239	0.805875
P18669	PGAM1	-2.92017	0.00076277	0.609835
P19652	ORM2	3.70957	0.0405146	0.805875
P19801	AOC1	-1.58959	0.0352753	0.805875
P19835	CEL	-1.50327	0.0118229	0.805875
P20810	CAST	3.08546	0.0482994	0.805875
P21333	FLNA	1.21896	0.0231809	0.805875
P21399	ACO1	1.25005	0.0423722	0.805875
P22455	FGFR4	2.78224	0.0416729	0.805875
P22792	CPN2	-1.59863	0.00937881	0.805875
P23284	PPIB	-1.47926	0.040124	0.805875
P24592	IGFBP6	2.80156	0.0078905	0.805875
P26572	MGAT1	-3.04612	0.0134021	0.805875
P27797	CALR	-2.1504	0.0178934	0.805875
P29622	SERPINA4	-1.22699	0.0232621	0.805875
P29966	MARCKS	1.99167	0.0308459	0.805875
P30626	SRI	1.28417	0.0304508	0.805875
P35625	TIMP3	-2.58086	0.0341579	0.805875
P36955	SERPINF1	-1.36941	0.0453533	0.805875
P36980	CFHR2	1.38623	0.0229575	0.805875
P40197	GP5	-2.36906	0.0268676	0.805875
P40926	MDH2	-1.75729	0.0200636	0.805875
P49441	INPP1	4.1603	0.00959422	0.805875
P68871	HBB	-2.56828	0.0462322	0.805875
P78324	SIRPA	1.64233	0.0206854	0.805875
P98082	DAB2	2.92377	0.0425341	0.805875
P98172	EFNB1	1.50945	0.0317148	0.805875
Q02818	NUCB1	3.72734	0.00408007	0.805875
Q12866	MERTK	2.01954	0.0426005	0.805875
Q14210	LY6D	1.81185	0.0384495	0.805875
Q14766	LTBP1	1.19904	0.0499304	0.805875
Q15746	MYLK	5.34633	0.00154193	0.805875
Q5KU26	COLEC12	1.31047	0.0272049	0.805875
Q5VYJ5	MALRD1	1.60476	0.0306248	0.805875
Q5ZPR3	CD276	1.16659	0.0312116	0.805875
Q6P531	GGT6	-1.72966	0.0227445	0.805875
Q6PCB0	VWA1	-1.57541	0.0212267	0.805875
Q6UXB4	CLEC4G	1.63694	0.0269864	0.805875
Q7Z304	MAMDC2	-1.54105	0.0129512	0.805875
Q8N335	GPD1L	-2.78444	0.0267373	0.805875
Q8N436	CPXM2	-2.61858	0.025501	0.805875
Q8NBJ4	GOLM1	4.63328	0.000656911	0.609835
Q92496	CFHR4	2.50213	0.0196755	0.805875
Q96IQ7	VSIG2	3.14889	0.0331269	0.805875
Q96P63	SERPINB12	-2.99019	0.0255047	0.805875
Q9BXL7	CARD11	-3.28268	0.0429265	0.805875
Q9BXN2	CLEC7A	1.46576	0.027252	0.805875
Q9H756	LRRC19	1.49734	0.0389041	0.805875
Q9HCL0	PCDH18	-2.02251	0.0309449	0.805875
Q9NPR2	SEMA4B	-1.45459	0.0231219	0.805875
Q9NQR4	NIT2	-1.96165	0.00601134	0.805875
Q9NR34	MAN1C1	-1.70321	0.0106177	0.805875
Q9NR99	MXRA5	-1.73563	0.0134455	0.805875
Q9NY25	CLEC5A	2.11899	0.0454432	0.805875
Q9UGT4	SUSD2	-1.12872	0.0355373	0.805875
Q9UKM7	MAN1B1	-2.6332	0.0454486	0.805875
Q9ULI3	HEG1	2.57923	0.0266909	0.805875
Q9Y561	LRP12	3.34675	0.0093306	0.805875
Q9Y5Y7	LYVE1	1.92279	0.0166628	0.805875
Q9Y6U3	SCIN	-1.19145	0.0307741	0.805875

## Sheet: Table S6
Table S6: Differentially expressed proteins between PCa and H groups.
ProteinGroups	Genes	logFC	P.Value	adj.P.Val
A0A075B6H9	IGLV4-69	3.07262	0.00102618	0.0845535
A0A075B6I0	IGLV8-61	2.75361	0.0269925	0.234466
A0A075B6I1	IGLV4-60	2.92411	0.0184902	0.201128
A0A075B6K4	IGLV3-10	1.71094	0.00395459	0.119904
A0A075B6S5	IGKV1-27	1.9444	0.00152579	0.0845535
A0A087WSY6	IGKV3D-15	1.49654	0.000883158	0.0845535
A0A0A0MT89	IGKJ1	1.37952	0.00352601	0.117337
A0A0B4J1X8	IGHV3-43	1.63343	0.00467015	0.125086
O00115	DNASE2	-1.11288	0.0199576	0.211339
O14786	NRP1	-1.3552	0.00692596	0.149657
O15143	ARPC1B	2.15318	0.0251869	0.232036
O15394	NCAM2	1.05579	0.0293168	0.235651
O43490	PROM1	1.71125	0.0433355	0.269039
O60234	GMFG	2.1077	0.0347724	0.249619
O60462	NRP2	-2.61638	0.0407053	0.259314
O60568	PLOD3	-1.17648	0.0252497	0.232036
O75144	ICOSLG	-1.44522	0.00910609	0.160007
O75309	CDH16	-1.18386	0.0448458	0.269581
O75326	SEMA7A	-2.63236	0.000458722	0.0845535
O75368	SH3BGRL	2.77097	0.00255229	0.109525
O75594	PGLYRP1	-0.79286	0.027374	0.234466
O75882	ATRN	-1.06787	0.00681403	0.149255
O75955	FLOT1	2.27098	0.0425251	0.268765
O75976	CPD	-1.25748	0.0396404	0.257105
O94910	ADGRL1	-0.982034	0.0170368	0.194079
O94985	CLSTN1	-1.05649	0.0399723	0.257105
O95274	LYPD3	-2.33484	0.0265559	0.234466
O95841	ANGPTL1	-1.77683	0.0149096	0.191528
O95971	CD160	-1.26491	0.0279355	0.234466
O96033	MOCS2	-1.38824	0.0231063	0.22516
P00915	CA1	2.16552	0.00519973	0.130752
P01031	C5	1.60349	0.0151352	0.191528
P01133	EGF	-1.69075	0.00510507	0.130752
P01601	IGKV1D-16	2.57855	0.0236579	0.22552
P01700	IGLV1-47	1.34469	0.00148633	0.0845535
P01701	IGLV1-51	1.17584	0.00585398	0.13566
P01704	IGLV2-14	1.64613	0.0308422	0.238879
P01714	IGLV3-19	1.22975	0.00631637	0.140276
P01715	IGLV3-1	1.58021	0.00365877	0.117337
P01718	IGLV3-27	1.70779	0.00338885	0.115293
P01764	IGHV3-23	-3.67508	0.00166789	0.0845535
P01834	IGKC	1.24012	0.013609	0.179841
P02679	FGG	2.38687	0.0107029	0.162989
P02743	APCS	1.95849	0.0103984	0.162989
P02748	C9	1.61022	0.00158089	0.0845535
P02750	LRG1	1.62507	0.0258044	0.234466
P02760	AMBP	0.956442	0.0376397	0.250774
P02765	AHSG	2.44449	0.00231766	0.108998
P02790	HPX	1.22115	0.0100307	0.162989
P04003	C4BPA	3.06071	0.0340616	0.247566
P04196	HRG	1.53177	0.0059501	0.135917
P05023	ATP1A1	1.86527	0.0367057	0.250774
P05155	SERPING1	-1.20928	0.0395071	0.257105
P05164	MPO	2.54142	0.0338348	0.247423
P05546	SERPIND1	1.93702	0.0135582	0.179841
P05997	COL5A2	-3.85255	0.00858945	0.156441
P06734	FCER2	-2.80081	0.00130861	0.0845535
P06870	KLK1	-1.8749	0.00837929	0.156441
P07333	CSF1R	-1.65851	0.0180421	0.200208
P07358	C8B	1.96422	0.0162524	0.193937
P07359	GP1BA	2.30171	0.0484616	0.278741
P07360	C8G	1.86021	0.0104494	0.162989
P07711	CTSL	-1.01566	0.0106999	0.162989
P07737	PFN1	1.43711	0.0406883	0.259314
P07911	UMOD	-1.2046	0.0494934	0.282643
P08254	MMP3	3.33614	0.00804875	0.156441
P08519	LPA	2.02288	0.0162155	0.193937
P08571	CD14	1.39321	0.0397639	0.257105
P08582	MELTF	-1.20411	0.028026	0.234466
P08637	FCGR3A	-1.29985	0.0270701	0.234466
P08887	IL6R	-1.67507	0.00133561	0.0845535
P09543	CNP	-2.60008	0.0223665	0.222958
P09958	FURIN	-2.73291	0.0104788	0.162989
P0DOX7	NA	1.52054	0.0309671	0.238879
P0DOX8	NA	2.66004	0.0192594	0.20808
P0DTE1	IGHV3-38-3	-2.13122	0.044249	0.269039
P10321	HLA-C	3.13087	0.0109775	0.164047
P10721	KIT	-1.74816	0.0327765	0.244904
P10912	GHR	-3.25054	0.00101353	0.0845535
P11047	LAMC1	-0.927928	0.0308791	0.238879
P11684	SCGB1A1	2.27016	0.0181552	0.200208
P12104	FABP2	2.62682	0.00169213	0.0845535
P12109	COL6A1	-1.15639	0.0429627	0.269039
P12273	PIP	-3.36813	0.00957641	0.162989
P13671	C6	1.89824	0.00517432	0.130752
P13688	CEACAM1	-2.07494	0.00133756	0.0845535
P14384	CPM	-1.21536	0.00281297	0.112351
P14778	IL1R1	-0.739955	0.0442491	0.269039
P14784	IL2RB	-1.36776	0.0296562	0.235651
P15085	CPA1	1.58734	0.040037	0.257105
P15090	FABP4	2.88809	0.0371403	0.250774
P15121	AKR1B1	-1.80139	0.00804622	0.156441
P15151	PVR	-1.06257	0.0373327	0.250774
P15309	ACP3	-2.50562	0.0471651	0.275245
P15814	IGLL1	1.42572	0.00429068	0.122514
P16112	ACAN	0.950872	0.0354389	0.249619
P16442	ABO	-2.5998	0.030068	0.236841
P16562	CRISP2	-2.86559	0.00250878	0.109525
P16871	IL7R	-3.22058	0.0102101	0.162989
P17181	IFNAR1	-1.48823	0.0109672	0.164047
P17813	ENG	-1.2826	0.032518	0.244904
P17900	GM2A	2.03817	0.0135396	0.179841
P18428	LBP	1.44414	0.0221702	0.222958
P19320	VCAM1	1.68797	0.0032321	0.112351
P19801	AOC1	-1.75697	0.00402528	0.119904
P19823	ITIH2	1.81182	0.0131949	0.179841
P19827	ITIH1	2.08074	0.00780427	0.156441
P20827	EFNA1	-1.08347	0.0131068	0.179841
P20933	AGA	-1.27622	0.0121106	0.174997
P21810	BGN	-1.37173	0.00404928	0.119904
P21860	ERBB3	-1.88238	0.0134746	0.179841
P22105	TNXB	-1.10149	0.0100341	0.162989
P23083	IGHV1-2	2.69696	0.0158319	0.193937
P23284	PPIB	-1.84486	0.0290587	0.235651
P25311	AZGP1	1.57847	0.00815211	0.156441
P26992	CNTFR	-1.33904	0.00301904	0.112351
P27930	IL1R2	-1.15289	0.00877479	0.156441
P28827	PTPRM	-1.13632	0.00710886	0.151561
P30530	AXL	-1.18749	0.00785515	0.156441
P31040	SDHA	-2.22084	0.000170966	0.0845535
P31431	SDC4	-1.45605	0.00315223	0.112351
P31947	SFN	2.47366	0.0283146	0.234586
P33908	MAN1A1	-1.77725	0.00875735	0.156441
P34741	SDC2	-1.20852	0.0445874	0.269039
P35052	GPC1	-1.08456	0.00842821	0.156441
P35475	IDUA	-1.2519	0.0295768	0.235651
P35858	IGFALS	-1.6467	0.0470281	0.275245
P36980	CFHR2	1.34228	0.0207255	0.216602
P39059	COL15A1	-1.72942	0.017091	0.194079
P39060	COL18A1	-0.887364	0.0268184	0.234466
P40189	IL6ST	-0.724282	0.0387042	0.255736
P40197	GP5	-2.02532	0.0172719	0.194079
P40313	CTRL	-3.06362	0.0327066	0.244904
P41217	CD200	-2.08747	0.0216546	0.220546
P45877	PPIC	-1.95883	0.0363229	0.250774
P47972	NPTX2	-2.51135	0.0356003	0.249619
P49189	ALDH9A1	-1.12376	0.0155055	0.192196
P49747	COMP	1.20762	0.034753	0.249619
P50895	BCAM	-0.993984	0.0337134	0.247423
P51797	CLCN6	1.18037	0.0122575	0.174997
P54289	CACNA2D1	-1.19803	0.016921	0.194079
P54652	HSPA2	-1.85296	0.00533857	0.131329
P55083	MFAP4	-1.83084	0.0212422	0.217733
P55268	LAMB2	-1.23905	0.00392078	0.119904
P61018	RAB4B	-2.29031	0.0270872	0.234466
P61106	RAB14	-1.00806	0.0203808	0.214401
P62318	SNRPD3	2.42078	0.0349334	0.249619
P78380	OLR1	-1.7916	0.0144237	0.188176
P78504	JAG1	-1.49419	0.0171467	0.194079
P98082	DAB2	4.49814	0.000532329	0.0845535
P98088	MUC5AC	2.77529	0.00116593	0.0845535
Q02413	DSG1	-1.41604	0.0279208	0.234466
Q02985	CFHR3	2.39659	0.0248551	0.232036
Q06418	TYRO3	-1.2479	0.0251867	0.232036
Q08345	DDR1	-1.44043	0.00291673	0.112351
Q12913	PTPRJ	-0.703263	0.0483268	0.278741
Q13308	PTK7	-1.15593	0.0353179	0.249619
Q13421	MSLN	2.09259	0.0082464	0.156441
Q13443	ADAM9	-1.90706	0.0152777	0.191528
Q13591	SEMA5A	-1.87747	0.000406196	0.0845535
Q13822	ENPP2	-1.07439	0.0297498	0.235651
Q14019	COTL1	1.60715	0.0144751	0.188176
Q14315	FLNC	0.837601	0.0267576	0.234466
Q14520	HABP2	1.81369	0.0477072	0.27639
Q14703	MBTPS1	-1.18037	0.0167303	0.194079
Q14764	MVP	2.29408	0.00999595	0.162989
Q14766	LTBP1	1.26366	0.0338873	0.247423
Q14767	LTBP2	-1.21719	0.0325296	0.244904
Q15113	PCOLCE	1.27918	0.00260284	0.109525
Q15223	NECTIN1	-1.37276	0.00523335	0.130752
Q15262	PTPRK	-1.38259	0.0184078	0.201128
Q15303	ERBB4	-1.58129	0.00125083	0.0845535
Q15848	ADIPOQ	1.10586	0.0488221	0.279808
Q16563	SYPL1	4.50209	0.0452689	0.271105
Q16787	LAMA3	-1.62717	0.00550776	0.131446
Q16832	DDR2	-1.12121	0.0101269	0.162989
Q16836	HADH	-2.27333	0.0380651	0.252556
Q24JP5	TMEM132A	-1.74535	0.0106368	0.162989
Q3LXA3	TKFC	1.95815	0.0465185	0.273467
Q562R1	ACTBL2	2.12665	0.0231912	0.22516
Q5SZK8	FREM2	-1.14253	0.043808	0.269039
Q5VT99	LRRC38	-1.86137	0.0371884	0.250774
Q5VUB5	FAM171A1	-1.83953	0.0161049	0.193937
Q6EMK4	VASN	-1.51158	0.0310396	0.238879
Q6GTX8	LAIR1	-2.25015	0.0265641	0.234466
Q6NUS6	TCTN3	-1.09268	0.0279623	0.234466
Q6PCB0	VWA1	-1.62101	0.0276701	0.234466
Q6UWR7	ENPP6	1.89977	0.0458689	0.272661
Q6UWY0	ARSK	-1.98712	0.0359052	0.249619
Q6UXE8	BTNL3	-2.98695	0.0151456	0.191528
Q6V0I7	FAT4	-1.57855	0.0234396	0.22552
Q6YHK3	CD109	-2.23808	0.0350953	0.249619
Q7L266	ASRGL1	-2.47336	0.00113016	0.0845535
Q7Z304	MAMDC2	-1.37708	0.0462109	0.272661
Q7Z7G0	ABI3BP	-1.28679	0.0293614	0.235651
Q7Z7M0	MEGF8	-1.27877	0.00796529	0.156441
Q86SF2	GALNT7	-1.6238	0.016081	0.193937
Q86TH1	ADAMTSL2	-2.11171	0.000557163	0.0845535
Q86UN2	RTN4RL1	-2.86325	0.00147828	0.0845535
Q86UN3	RTN4RL2	-1.13683	0.0281535	0.234466
Q86UX2	ITIH5	-1.04017	0.0390805	0.256106
Q8IUK5	PLXDC1	-1.88324	0.0013979	0.0845535
Q8IUL8	CILP2	-2.14781	0.000523309	0.0845535
Q8IWV2	CNTN4	-2.01831	0.000371811	0.0845535
Q8N8N7	PTGR2	-1.95256	0.000519961	0.0845535
Q8NBJ7	SUMF2	-1.20197	0.031422	0.240401
Q8NDA2	HMCN2	-1.56752	0.0228085	0.225128
Q8NEZ4	KMT2C	-4.04148	0.00102659	0.0845535
Q8NFP4	MDGA1	-1.88385	0.0445746	0.269039
Q8NFT8	DNER	-1.50762	0.0236944	0.22552
Q8TAB3	PCDH19	-1.76097	0.019848	0.211339
Q8TB96	ITFG1	-2.16623	0.0476975	0.27639
Q8TCD5	NT5C	-2.69884	0.00321495	0.112351
Q8TDY8	IGDCC4	-3.22567	0.000266858	0.0845535
Q8TEB7	RNF128	-2.22085	0.0420826	0.267024
Q8TER0	SNED1	-2.62639	0.0117874	0.172918
Q8WVN6	SECTM1	-0.888253	0.0297695	0.235651
Q8WVQ1	CANT1	-1.96922	0.00627363	0.140276
Q8WWA0	ITLN1	-4.45862	0.00316194	0.112351
Q8WZ42	TTN	1.3635	0.0281058	0.234466
Q8WZ75	ROBO4	-1.57917	0.0125959	0.175138
Q92496	CFHR4	4.37736	0.000623873	0.0845535
Q92563	SPOCK2	-1.56542	0.0122465	0.174997
Q92673	SORL1	-1.07685	0.00547331	0.131446
Q92823	NRCAM	-1.44059	0.000907208	0.0845535
Q92859	NEO1	-0.843722	0.0460821	0.272661
Q92890	UFD1	0.891304	0.0324496	0.244904
Q93091	RNASE6	2.7566	0.0102962	0.162989
Q96IQ7	VSIG2	1.27602	0.043763	0.269039
Q96MU8	KREMEN1	-1.40237	0.00112118	0.0845535
Q96PD2	DCBLD2	-1.36275	0.00414128	0.120398
Q96RW7	HMCN1	-0.919118	0.0194737	0.208983
Q99426	TBCB	1.33442	0.0293114	0.235651
Q99523	SORT1	-1.14029	0.00469365	0.125086
Q99574	SERPINI1	-1.13222	0.0088053	0.156441
Q99715	COL12A1	1.00419	0.037261	0.250774
Q99784	OLFM1	-1.06131	0.0222984	0.222958
Q99798	ACO2	-3.14305	0.0336716	0.247423
Q99941	ATF6B	-2.76903	0.00734333	0.1545
Q99969	RARRES2	-1.52167	0.0210644	0.2175
Q9BQ51	PDCD1LG2	-1.36769	0.0374994	0.250774
Q9BRF8	CPPED1	-1.30256	0.0210835	0.2175
Q9BRK5	SDF4	-2.52712	0.029614	0.235651
Q9BXL7	CARD11	-3.97435	0.00444722	0.124756
Q9BXP8	PAPPA2	1.71421	0.0018162	0.0880031
Q9BZM4	ULBP3	-1.3508	0.0445422	0.269039
Q9GZP0	PDGFD	-1.77636	0.017261	0.194079
Q9H8L6	MMRN2	-1.59484	0.00249502	0.109525
Q9HBB8	CDHR5	-1.64579	0.00163591	0.0845535
Q9HC56	PCDH9	-1.31933	0.0153318	0.191528
Q9HD45	TM9SF3	1.37578	0.0389945	0.256106
Q9NPG4	PCDH12	-2.26151	0.0117073	0.172918
Q9NQS3	NECTIN3	-1.80642	0.0373745	0.250774
Q9NQU5	PAK6	1.41437	0.00560957	0.131907
Q9NUM4	TMEM106B	1.59316	0.0167268	0.194079
Q9NY33	DPP3	-1.02144	0.0442931	0.269039
Q9NZ08	ERAP1	-1.05412	0.01252	0.175138
Q9NZ56	FMN2	2.10072	0.00098884	0.0845535
Q9NZP8	C1RL	-0.954357	0.0357178	0.249619
Q9P1F3	ABRACL	2.49099	0.0265365	0.234466
Q9P232	CNTN3	-2.71617	0.00928962	0.161458
Q9UBB9	TFIP11	3.41391	0.0232341	0.22516
Q9UBG0	MRC2	-1.59621	0.00464359	0.125086
Q9UBN4	TRPC4	1.94518	0.0368909	0.250774
Q9UBR2	CTSZ	0.938566	0.0337064	0.247423
Q9UGM5	FETUB	1.30073	0.0224492	0.222958
Q9UGT4	SUSD2	-0.97021	0.0433295	0.269039
Q9UIB8	CD84	-0.980726	0.0462104	0.272661
Q9UIQ6	LNPEP	-2.57621	0.00366908	0.117337
Q9UJ99	CDH22	-1.85973	0.0358917	0.249619
Q9UKM7	MAN1B1	-2.32331	0.0260143	0.234466
Q9UNN8	PROCR	-1.4666	0.00300542	0.112351
Q9UPX0	IGSF9B	-1.81074	0.0125853	0.175138
Q9UPZ6	THSD7A	-1.03479	0.049757	0.283137
Q9Y274	ST3GAL6	1.08764	0.00773552	0.156441
Q9Y490	TLN1	2.46724	0.0016903	0.0845535
Q9Y547	HSPB11	0.928923	0.0427116	0.268881
Q9Y561	LRP12	2.38515	0.0310736	0.238879
Q9Y5Y7	LYVE1	1.68952	0.0242599	0.229536
Q9Y653	ADGRG1	-1.27609	0.0245504	0.230918
Q9Y6X5	ENPP4	1.09825	0.0173566	0.194079

## Sheet: Table S7
Table S7: Differentially expressed proteins between BPH and H groups.
ProteinGroups	Genes	logFC	P.Value	adj.P.Val
A0A075B6H9	IGLV4-69	2.0485	0.0111558	0.136469
A0A075B6K4	IGLV3-10	1.25266	0.020163	0.169537
A0A075B6S5	IGKV1-27	1.47765	0.00907475	0.131259
A0A087WSY6	IGKV3D-15	0.831476	0.0299163	0.202695
A0A0A0MS15	IGHV3-49	1.00617	0.037099	0.228051
A0A0A0MT89	IGKJ1	1.01492	0.0404341	0.234232
O00461	GOLIM4	-3.12785	0.0137735	0.145567
O00584	RNASET2	-1.8834	0.0195393	0.168883
O14498	ISLR	1.21979	0.0228728	0.174603
O14786	NRP1	-1.04386	0.0279959	0.19634
O15394	NCAM2	0.981331	0.0228232	0.174603
O43852	CALU	-3.34134	0.00406589	0.107421
O43895	XPNPEP2	1.01526	0.0406391	0.234232
O43921	EFNA2	-3.28408	0.0106419	0.136469
O60241	ADGRB2	-2.22007	0.0209056	0.172008
O75015	FCGR3B	-1.74837	0.0396814	0.233764
O75074	LRP3	-1.07251	0.0268435	0.192478
O75083	WDR1	1.50631	0.0417188	0.237397
O75144	ICOSLG	-1.39833	0.00555175	0.116806
O75326	SEMA7A	-1.52702	0.00692388	0.123014
O94910	ADGRL1	-1.11969	0.015665	0.150894
O95274	LYPD3	-3.37817	0.00951621	0.132068
O95297	MPZL1	-0.924947	0.00982367	0.132068
O95445	APOM	0.945558	0.0270935	0.192979
O95831	AIFM1	2.76192	0.0199177	0.169511
O95998	IL18BP	-2.69136	0.0111609	0.136469
P00491	PNP	1.33163	0.0232296	0.176039
P00505	GOT2	1.91005	0.00690989	0.123014
P00740	F9	2.92594	0.00771728	0.123433
P00746	CFD	1.75401	0.00188476	0.0888132
P00747	PLG	1.22847	0.0139285	0.145567
P00748	F12	1.50914	0.0163743	0.152096
P00751	CFB	1.85474	0.0022015	0.0888132
P00915	CA1	2.83433	0.00145741	0.0888132
P00918	CA2	0.933545	0.0229157	0.174603
P01008	SERPINC1	1.51847	0.0133478	0.145567
P01023	A2M	2.85109	0.0339858	0.219126
P01024	C3	1.85143	0.0267423	0.192478
P01031	C5	2.40907	0.00521582	0.116806
P01040	CSTA	-2.53826	0.00554434	0.116806
P01700	IGLV1-47	0.9924	0.0209766	0.172008
P01714	IGLV3-19	0.748698	0.049345	0.262551
P01718	IGLV3-27	2.26062	0.00137173	0.0888132
P01766	IGHV3-13	1.06647	0.0252547	0.186093
P01834	IGKC	1.09977	0.0397647	0.233764
P01871	IGHM	1.02755	0.0235214	0.176576
P01889	HLA-B	2.77457	0.0246592	0.184253
P02545	LMNA	1.77347	0.0113936	0.13698
P02647	APOA1	2.42629	0.00580436	0.117056
P02652	APOA2	2.36109	0.00247491	0.0920319
P02675	FGB	3.50668	0.000897321	0.0863832
P02679	FGG	3.62282	0.00053141	0.0854393
P02745	C1QA	4.55613	0.01192	0.138894
P02746	C1QB	3.56322	0.0132771	0.145567
P02747	C1QC	3.6916	0.00952504	0.132068
P02748	C9	2.58652	9.15377e-05	0.0332537
P02750	LRG1	1.86413	0.0164413	0.152096
P02765	AHSG	2.38815	0.00627912	0.119201
P03952	KLKB1	1.89356	0.0170307	0.153853
P04003	C4BPA	4.36128	0.00737243	0.123433
P04156	PRNP	-1.07576	0.0176501	0.157125
P04196	HRG	1.69767	0.00927596	0.131259
P04278	SHBG	2.32806	0.00474715	0.113294
P05060	CHGB	-4.65738	0.000641195	0.0854393
P05160	F13B	1.61251	0.0203566	0.169537
P05166	PCCB	2.20462	0.00590389	0.117056
P05362	ICAM1	-0.963405	0.036834	0.228051
P05546	SERPIND1	2.77731	0.00163133	0.0888132
P05783	KRT18	2.32503	0.0178271	0.157489
P05997	COL5A2	-4.8138	0.000103983	0.0332537
P06310	IGKV2-30	2.36668	0.00502945	0.11667
P06681	C2	2.08668	0.0083556	0.125429
P06734	FCER2	-3.90512	0.014444	0.146463
P07195	LDHB	1.51687	0.0273961	0.192979
P07204	THBD	-0.805408	0.0336407	0.219126
P07333	CSF1R	-1.70175	0.0160558	0.152096
P07358	C8B	2.89392	0.00175218	0.0888132
P07360	C8G	3.58278	0.00024944	0.0569791
P07711	CTSL	-0.928233	0.0249844	0.184954
P07910	HNRNPC	3.86416	0.0219045	0.174603
P07911	UMOD	-1.71458	0.00515398	0.116806
P07998	RNASE1	-1.77715	0.00165093	0.0888132
P08254	MMP3	2.93395	0.0182129	0.160013
P08263	GSTA1	1.54493	0.0496397	0.262551
P08571	CD14	2.05875	0.00754284	0.123433
P08603	CFH	1.56332	0.0482574	0.260688
P08637	FCGR3A	-1.45558	0.0151681	0.147973
P08697	SERPINF2	1.31296	0.0390737	0.232264
P08727	KRT19	1.82184	0.0423158	0.239092
P09210	GSTA2	2.11022	0.00725079	0.123433
P09486	SPARC	-2.78867	0.0111417	0.136469
P09603	CSF1	-1.19697	0.0117441	0.138894
P09619	PDGFRB	-1.08847	0.0113463	0.13698
P09622	DLD	2.00627	0.0221752	0.174603
P09871	C1S	1.27632	0.0298557	0.202695
P0C0L5	C4B_2	1.44743	0.00720672	0.123433
P0DOX4	NA	1.53803	0.043423	0.242161
P10451	SPP1	-2.68062	0.0164557	0.152096
P10643	C7	1.80729	0.0091579	0.131259
P10645	CHGA	-3.8969	0.0369705	0.228051
P10646	TFPI	-3.31676	0.000820108	0.0863832
P10768	ESD	-2.90247	0.00691659	0.123014
P10809	HSPD1	1.45605	0.0419774	0.238021
P10912	GHR	-1.93902	0.0448937	0.247535
P11047	LAMC1	-0.735797	0.0339338	0.219126
P11597	CETP	1.27967	0.00576087	0.117056
P12104	FABP2	2.06922	0.00643811	0.119704
P12111	COL6A3	-1.01907	0.00729319	0.123433
P13598	ICAM2	-2.0505	0.0108017	0.136469
P13671	C6	1.93449	0.00246321	0.0920319
P13688	CEACAM1	-2.84571	0.0035589	0.101619
P13987	CD59	-2.2849	0.00283735	0.0959103
P14091	CTSE	-2.4235	0.0386244	0.232264
P14384	CPM	-1.54186	0.000627422	0.0854393
P14778	IL1R1	-1.67125	0.0119871	0.138894
P14784	IL2RB	-2.65531	0.00971213	0.132068
P15085	CPA1	2.46669	0.00770706	0.123433
P15090	FABP4	3.86534	0.0149532	0.147594
P15151	PVR	-1.13525	0.0226224	0.174603
P15169	CPN1	1.31641	0.0402107	0.234232
P15814	IGLL1	1.2063	0.0213278	0.173995
P16070	CD44	-1.56063	0.00392828	0.106463
P16234	PDGFRA	-1.18234	0.0233586	0.176181
P16562	CRISP2	-2.50381	0.00301733	0.0970203
P17813	ENG	-1.40949	0.0148029	0.147594
P17900	GM2A	1.9679	0.022198	0.174603
P18428	LBP	1.8591	0.00314571	0.0984571
P19022	CDH2	-2.10119	0.00592965	0.117056
P19256	CD58	-1.36843	0.0129871	0.145567
P19320	VCAM1	1.67141	0.00151595	0.0888132
P19438	TNFRSF1A	-2.52633	0.0020177	0.0888132
P19652	ORM2	-3.46583	0.0393347	0.232949
P19823	ITIH2	2.79523	0.00105375	0.0888132
P19827	ITIH1	3.38073	0.00046867	0.0854393
P20138	CD33	-1.78635	0.0176876	0.157125
P20774	OGN	2.30187	0.00847173	0.125429
P20810	CAST	-2.48595	0.0264149	0.19112
P20827	EFNA1	-2.35475	0.00439458	0.108107
P20933	AGA	-1.9047	0.00576962	0.117056
P22304	IDS	-1.29661	0.000918396	0.0863832
P22626	HNRNPA2B1	1.76401	0.0223192	0.174603
P22792	CPN2	2.12442	0.00328142	0.0989998
P23083	IGHV1-2	2.88073	0.00259692	0.0931294
P24158	PRTN3	2.20491	0.0352531	0.221928
P25940	COL5A3	-1.15354	0.0145775	0.1466
P26038	MSN	0.99829	0.0337242	0.219126
P26641	EEF1G	1.21642	0.00555132	0.116806
P26992	CNTFR	-1.04247	0.0387523	0.232264
P27105	STOM	1.70627	0.0363592	0.227103
P27169	PON1	2.53213	0.014864	0.147594
P27487	DPP4	1.15838	0.0479677	0.260688
P27797	CALR	1.93991	0.00190732	0.0888132
P27824	CANX	1.87063	0.0204631	0.169537
P28827	PTPRM	-0.829561	0.048136	0.260688
P29323	EPHB2	-1.17204	0.00348055	0.101189
P30086	PEBP1	-0.949495	0.0138022	0.145567
P30530	AXL	-1.26546	0.00923664	0.131259
P31431	SDC4	-2.05051	0.0140383	0.145762
P31944	CASP14	-2.76269	0.0488349	0.261519
P35613	BSG	-0.722286	0.0495117	0.262551
P41217	CD200	-1.64485	0.00550992	0.116806
P46940	IQGAP1	2.52425	0.0347794	0.221928
P48444	ARCN1	2.78444	0.0134486	0.145567
P49441	INPP1	-5.57669	4.09813e-07	0.000655291
P50135	HNMT	-1.31218	0.0303637	0.204859
P50895	BCAM	-0.783694	0.0352174	0.221928
P52823	STC1	-1.16989	0.0357595	0.224233
P54289	CACNA2D1	-1.15464	0.0383448	0.232264
P54826	GAS1	-3.24056	0.00409799	0.107421
P55259	GP2	-1.76098	0.0118986	0.138894
P55268	LAMB2	-0.716801	0.0444066	0.245696
P55290	CDH13	-1.1826	0.0139043	0.145567
P61225	RAP2B	-1.8798	0.0296621	0.202691
P61586	RHOA	-1.92029	0.0406315	0.234232
P62318	SNRPD3	2.48052	0.0497518	0.262551
P68871	HBB	3.78796	0.022931	0.174603
P69905	HBA2	3.24789	0.0335411	0.219126
P78324	SIRPA	-1.51003	0.0431642	0.242161
P78380	OLR1	-1.1053	0.0151767	0.147973
P78504	JAG1	-1.42407	0.0384268	0.232264
P78563	ADARB1	1.11236	0.025767	0.187279
P80108	GPLD1	1.99923	0.0033454	0.0990611
P98172	EFNB1	-1.49717	0.013881	0.145567
Q00839	HNRNPU	-1.10961	0.0125583	0.144466
Q01974	ROR2	-0.962775	0.0101131	0.134757
Q02747	GUCA2A	-3.56125	0.00633654	0.119201
Q02818	NUCB1	-4.49334	4.03987e-05	0.0215325
Q02985	CFHR3	1.7478	0.0414396	0.23665
Q06033	ITIH3	4.45389	0.00303378	0.0970203
Q06418	TYRO3	-1.50525	0.0401198	0.234232
Q07075	ENPEP	2.14718	0.00179864	0.0888132
Q08380	LGALS3BP	-0.880211	0.0283255	0.197784
Q08554	DSC1	2.89353	0.00381729	0.105239
Q08629	SPOCK1	-2.34026	0.0463593	0.253865
Q12866	MERTK	-1.7235	0.00155483	0.0888132
Q12913	PTPRJ	-0.932965	0.0162652	0.152096
Q13103	SPP2	1.59839	0.01993	0.169511
Q13308	PTK7	-1.03035	0.0107775	0.136469
Q13443	ADAM9	-2.24996	0.00784072	0.123433
Q13477	MADCAM1	-1.06386	0.0164043	0.152096
Q13508	ART3	2.53318	0.0109704	0.136469
Q13591	SEMA5A	-1.01184	0.0197137	0.169474
Q13813	SPTAN1	1.33917	0.0169174	0.153698
Q14019	COTL1	1.24227	0.0388011	0.232264
Q14520	HABP2	2.63766	0.0138733	0.145567
Q14764	MVP	2.4637	0.0105231	0.136469
Q15223	NECTIN1	-1.57119	0.0026209	0.0931294
Q15303	ERBB4	-1.20709	0.00320186	0.0984571
Q15582	TGFBI	1.83061	0.00447063	0.108311
Q15746	MYLK	-4.65207	0.000847394	0.0863832
Q15848	ADIPOQ	1.53025	0.0110257	0.136469
Q16270	IGFBP7	-1.32494	0.02272	0.174603
Q16363	LAMA4	-2.51958	0.00423146	0.10807
Q16651	PRSS8	-1.25217	0.00133183	0.0888132
Q16787	LAMA3	-1.09196	0.0102956	0.136055
Q16832	DDR2	-1.36083	0.00828437	0.125429
Q5JXA9	SIRPB2	-2.15276	0.0224344	0.174603
Q5VYJ5	MALRD1	-1.96756	0.0172533	0.154989
Q6GTX8	LAIR1	-3.73502	0.0017626	0.0888132
Q6P4A8	PLBD1	-1.02911	0.0348384	0.221928
Q6UVK1	CSPG4	-0.899744	0.0434647	0.242161
Q6UWR7	ENPP6	2.61852	0.0293678	0.20197
Q6UXB4	CLEC4G	-1.57072	0.0187872	0.163265
Q6UXD5	SEZ6L2	-1.06428	0.0294303	0.20197
Q6UXE8	BTNL3	-2.81296	0.00209986	0.0888132
Q6UXG3	CD300LG	-1.21759	0.0273815	0.192979
Q7L266	ASRGL1	-3.19589	0.00239341	0.0920319
Q7Z3B1	NEGR1	-0.82134	0.0346118	0.221928
Q7Z4F1	LRP10	-1.14163	0.00655195	0.12042
Q7Z6M3	MILR1	-2.41323	0.0350614	0.221928
Q7Z7G0	ABI3BP	-1.07441	0.0216952	0.174603
Q86T13	CLEC14A	-1.14488	0.00982872	0.132068
Q86TH1	ADAMTSL2	-1.50397	0.00432548	0.10807
Q86UN2	RTN4RL1	-3.11638	1.0387e-05	0.0083044
Q86UN3	RTN4RL2	-1.27152	0.0169087	0.153698
Q86WQ0	NR2C2AP	-1.85613	0.0489019	0.261519
Q86X29	LSR	-2.33277	0.00980599	0.132068
Q86YT9	JAML	1.35611	0.00285111	0.0959103
Q8IUL8	CILP2	-1.2653	0.00845955	0.125429
Q8IWV2	CNTN4	-1.06988	0.0143784	0.146463
Q8IYS5	OSCAR	-0.983258	0.0409448	0.234662
Q8N126	CADM3	0.738964	0.0424697	0.239116
Q8N436	CPXM2	1.87545	0.0331865	0.219126
Q8N8N7	PTGR2	-1.52934	0.00547019	0.116806
Q8NBJ4	GOLM1	-4.78627	0.00013928	0.0371182
Q8NBJ7	SUMF2	-1.41493	0.0133968	0.145567
Q8NCC3	PLA2G15	0.975315	0.0407233	0.234232
Q8NDA2	HMCN2	-1.82797	0.000625933	0.0854393
Q8NEZ4	KMT2C	-2.64102	0.0155063	0.15027
Q8NFT8	DNER	-1.27599	0.0285062	0.19818
Q8TCD5	NT5C	-3.81516	0.0228112	0.174603
Q8TCT8	SPPL2A	-1.47066	0.0080046	0.124266
Q8TDY8	IGDCC4	-2.73955	0.00222172	0.0888132
Q8WVN6	SECTM1	-0.922044	0.0291016	0.201443
Q8WVQ1	CANT1	-1.64528	0.00218906	0.0888132
Q8WWA0	ITLN1	-2.47533	0.0318679	0.214104
Q8WZ42	TTN	1.28288	0.038946	0.232264
Q8WZ75	ROBO4	-1.17131	0.0136109	0.145567
Q92673	SORL1	-0.93896	0.0257614	0.187279
Q92823	NRCAM	-0.973581	0.0253852	0.186197
Q92832	NELL1	-3.48094	0.00106618	0.0888132
Q92859	NEO1	-1.0424	0.00779121	0.123433
Q969E1	LEAP2	-0.844008	0.0472	0.257586
Q96FE7	PIK3IP1	-1.69386	0.0080931	0.124431
Q96FV2	SCRN2	-1.63046	0.0111804	0.136469
Q96J84	KIRREL1	-0.965528	0.0219541	0.174603
Q96MU8	KREMEN1	-1.27478	0.00429701	0.10807
Q96RW7	HMCN1	-1.18192	0.00787379	0.123433
Q99426	TBCB	0.963084	0.0488702	0.261519
Q99988	GDF15	2.48335	0.00380986	0.105239
Q9BQ51	PDCD1LG2	-1.30161	0.00632664	0.119201
Q9BRA2	TXNDC17	-1.64317	0.020303	0.169537
Q9BRK5	SDF4	-1.10203	0.0333705	0.219126
Q9BXN2	CLEC7A	-1.89276	0.00175069	0.0888132
Q9BY67	CADM1	-1.42081	0.00751275	0.123433
Q9GZP0	PDGFD	-1.84801	0.0273388	0.192979
Q9GZX9	TWSG1	-2.73735	0.00752595	0.123433
Q9H6Y7	RNF167	-0.92483	0.0320036	0.214116
Q9H756	LRRC19	-1.92017	0.00287911	0.0959103
Q9H8L6	MMRN2	-2.10269	0.0136106	0.145567
Q9HBB8	CDHR5	-1.13465	0.0326774	0.21681
Q9HCN6	GP6	-1.22116	0.0160503	0.152096
Q9HCU0	CD248	-1.29983	0.00503455	0.11667
Q9NNX6	CD209	-1.98613	0.0204449	0.169537
Q9NQR4	NIT2	3.4635	0.0132764	0.145567
Q9NQS3	NECTIN3	-2.23927	0.00184368	0.0888132
Q9NR99	MXRA5	1.09601	0.0367896	0.228051
Q9NRX4	PHPT1	-1.37299	0.0458637	0.252014
Q9NUM4	TMEM106B	1.55069	0.0144723	0.146463
Q9NZ56	FMN2	1.49606	0.0439801	0.244181
Q9P121	NTM	-0.814838	0.0322413	0.214808
Q9UBG0	MRC2	-1.68945	0.00197464	0.0888132
Q9UGM5	FETUB	1.67599	0.00179545	0.0888132
Q9UI42	CPA4	-3.31843	0.0144616	0.146463
Q9UIB8	CD84	-0.968589	0.0389869	0.232264
Q9UIQ6	LNPEP	-1.06201	0.0372241	0.228051
Q9UKJ1	PILRA	1.26857	0.0119706	0.138894
Q9ULI3	HEG1	-2.51584	0.0187461	0.163265
Q9UNN8	PROCR	-1.66862	0.000840596	0.0863832
Q9UPZ6	THSD7A	-1.60504	0.0248258	0.184635
Q9UQV4	LAMP3	-2.13202	0.0168058	0.153698
Q9Y490	TLN1	2.00159	0.00619435	0.119201
Q9Y4K0	LOXL2	-2.40765	0.00893882	0.13113
